# Supplementary material
Source: MDPI journal article supplement (https://www.mdpi.com/2674-1334/2/4/11)
Supplement: s1 [file s1]

*Supplementary Materials*

# **Role of curing agents in the adaptive response of the bioprotective *Latilactobacillus curvatus* CRL 705 from a physiologic and proteomic perspective**

**Lucrecia C. Terán, Alejandra Orihuel, Emilse Bentencourt, E, Raúl Raya and Silvina Fadda \***

Centro de Referencia para Lactobacilos, Consejo Nacional de Investigaciones Científicas y Técnicas (CERELA CONICET), Chacabuco 145, T4000ILC, San Miguel de Tucumán, Tucumán, Argentina; lucreteran@gmail.com (L.C.T.); rraya@cerela.org.ar (R.R.)

\* Correspondence: sfadda@cerela.org.ar (S.F.)

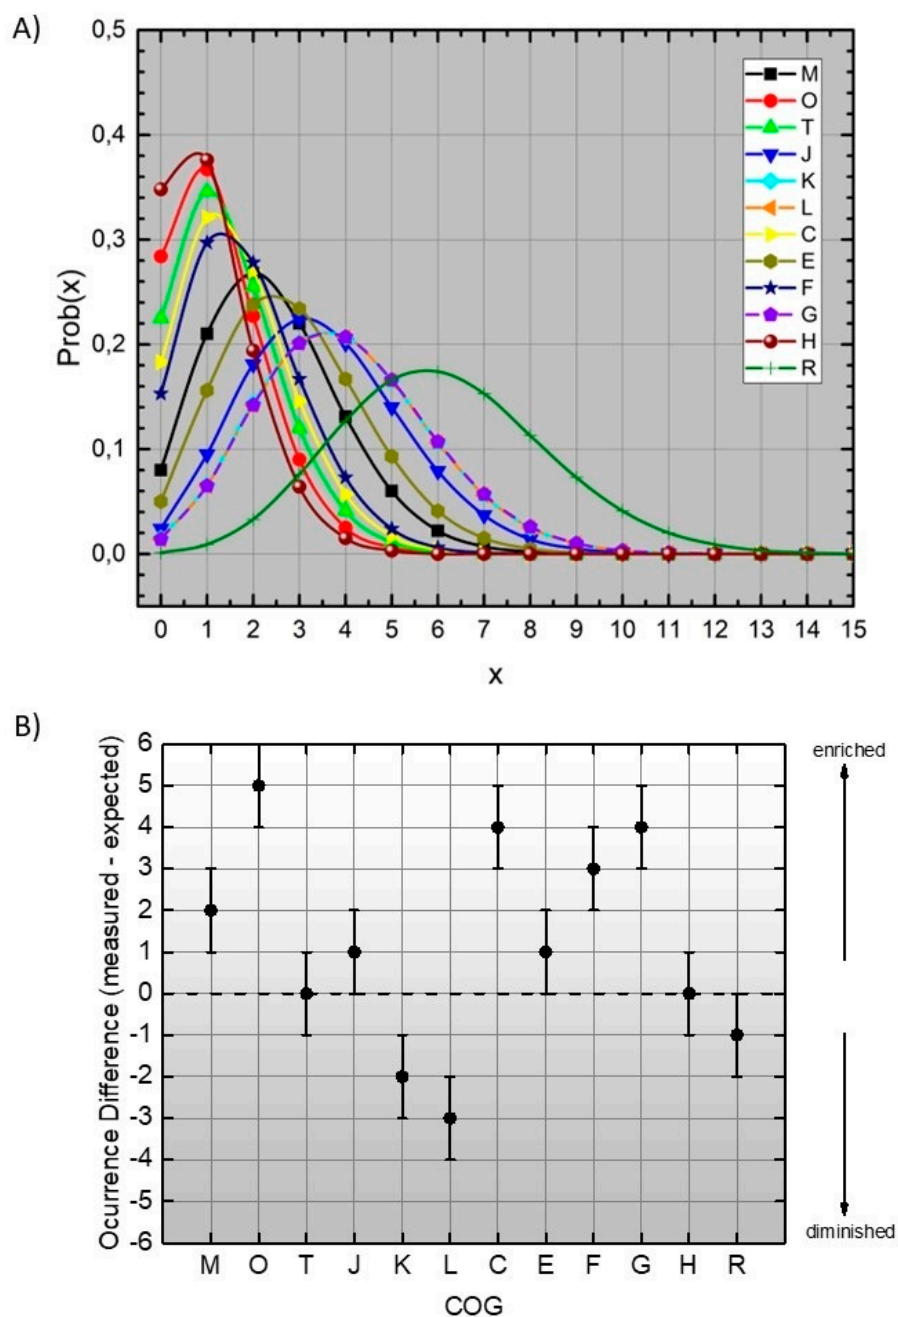

**Figure S1. A)** Hypergeometric distribution for the probabilities (Prob) of finding a certain COG functional category a certain number of times “x” of the differentially expressed proteins of *L. curvatus* CRL 705 while growing in CDM with and without additives at 25 °C. The highest value of the y axis (Prob) for each of the curves represents the higher probability of the times of occurrence of proteins from a certain COG. **B)** Differences between measured and expected occurrence for the proteins of each COG category, where 0 represents no differences in occurrence and separates potentially enriched categories (positive values) from the potentially impoverished categories (negative values).

**Table S1.** Differentially expressed proteins by *L. curvatus* CRL 705 during growth in CDM with (CDM<sup>+CA</sup>) and without (CDM<sup>-</sup>) the presence of curing additives (CA) at 25°C

| Biological process                       | COG <sup>a</sup> | Spot N <sup>qb</sup> | UniProt entry | Name of the protein and abbreviation                                               | MASCOT Score <sup>c</sup> | # matching peptides <sup>d</sup> | MM/pI <sup>f</sup> | Fold changes <sup>g</sup> | Detailed 2DE gel showing differentially expressed spot in:                            |                                                                                       |
|------------------------------------------|------------------|----------------------|---------------|------------------------------------------------------------------------------------|---------------------------|----------------------------------|--------------------|---------------------------|---------------------------------------------------------------------------------------|---------------------------------------------------------------------------------------|
|                                          |                  |                      |               |                                                                                    |                           |                                  |                    |                           | CDM <sup>+CA</sup>                                                                    | CDM <sup>-</sup>                                                                      |
| TRANSLATION AND MODIFICATION OF PROTEINS | O                | LT04                 | A0A3R5V4Y6    | Trigger factor<br>Tig<br>WP_004271115.1                                            | 218                       | 7                                | 47903/<br>4.43     | -1.5                      | 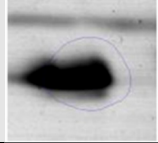   |    |
|                                          | O                | LT08                 | A0A385ACP8    | ATP-dependent Clp protease<br>ATP-binding subunit<br>DT351_03000<br>WP_004265761.1 | 136                       | 4                                | 81331/<br>5.06     | -3.0                      |    |    |
|                                          | J                | LT12                 | A0A385ACG4    | Glutamyl-tRNA(Gln)<br>amidotransferase subunit A<br>GatA<br>WP_004270872.1         | 408                       | 12                               | 51771/<br>4.90     | -1.2                      |    |    |
|                                          | J                | LT16                 | A0A1B2A539    | 50S ribosomal protein L10<br>RplJ<br>WP_064777478.1                                | 350                       | 8                                | 17832/<br>4.97     | -1.3                      |   |   |
|                                          | J                | LT25                 | A0A1X7QIK5    | Elongation factor Tu<br>TufA<br>WP_004271118.1                                     | 112                       | 2                                | 43183/<br>4.70     | -1.2                      |  |  |
|                                          | J                | LT40                 | A0A1B2A552    | 50S ribosomal protein L7/L12<br>RplL<br>WP_004270851.1                             | 413                       | 4                                | 12639/<br>4.43     | -1.5                      |  |  |

CARBOHYDRATES METABOLISM AND ENERGY  
PRODUCTION

|   |      |               |                                                                                           |     |   |                 |      |                                                                                       |                                                                                       |
|---|------|---------------|-------------------------------------------------------------------------------------------|-----|---|-----------------|------|---------------------------------------------------------------------------------------|---------------------------------------------------------------------------------------|
| O | LT42 | A0A0B2XPV1    | Molecular chaperone<br>GroEL<br>WP_004265033.1                                            | 324 | 6 | 57243/<br>4.67  | -1.4 | 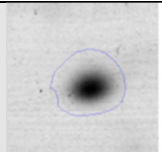   |    |
| G | LT09 | A0A0B2XPK6    | 2,3-diphosphoglycerate-<br>dependent phosphoglycerate<br>mutase<br>GpmA<br>WP_039098080.1 | 111 | 2 | 258382/<br>5.13 | -1.5 |    |    |
| G | LT10 | UPI000230F3DE | sn-glycerol-3-phosphate ABC<br>transporter ATP-binding protein<br>UgpC<br>WP_004266075.1  | 161 | 3 | 40966/<br>5.36  | +2.3 |    |    |
| G | LT26 | UPI000230F588 | PTS mannose transporter<br>subunit IIAB<br>ManX<br>WP_004270728.1                         | 279 | 7 | 35347/<br>5.34  | -1.3 |    |    |
| G | LT27 | A0A0B2XK70    | (ATP dependent)<br>6-phosphofructokinase<br>PfkA<br>KHO12221.1                            | 234 | 6 | 33664/<br>5.26  | -1.5 |    |    |
| G | LT30 | A0A1B2A4B2    | 2,3-diphosphoglycerate-<br>dependent phosphoglycerate<br>mutase<br>GpmA<br>WP_004271006.1 | 345 | 8 | 25868/<br>5.04  | -1.5 |   |   |
| G | LT31 | A0A1B2A408    | Histidine phosphatase<br>LCU_08255<br>WP_004266073.1                                      | 300 | 9 | 24829/<br>6.08  | -1.8 |  |  |

METABOLISM AND TRANSPORT OF  
AMINOACIDS AND NUCLEOTIDES

|        |      |               |                                                               |     |   |                         |      |                                                                                       |                                                                                       |
|--------|------|---------------|---------------------------------------------------------------|-----|---|-------------------------|------|---------------------------------------------------------------------------------------|---------------------------------------------------------------------------------------|
| C      | LT32 | A0A1B2A5E8    | L-lactate dehydrogenase<br>Ldh<br>WP_004270763.1              | 298 | 7 | 33664/<br>5.26          | -1.4 | 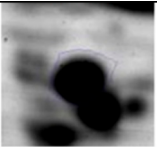   |    |
| G<br>T | LT36 | UPI000230EFAA | Pyruvate kinase<br>Pyk<br>WP_004270411.1                      | 271 | 8 | 62980/<br>5.27          | -1.4 |    |    |
| C      | LT41 | A0A385ADR5    | L-lactate oxidase<br>DT351_03565<br>WP_004265223.1            | 220 | 1 | 39721/<br>5.36          | +1.7 |    |    |
| C      | LT43 | UPI000B5E1B86 | Dihydrolipoyl dehydrogenase<br>LpdA<br>ASN60289.1             | 103 | 1 | 49610<br>49330/<br>5.07 | -1.4 |    |    |
| F      | LT02 | A0A4U0E4L1    | Dihydroorotase<br>FCF11_02690<br>WP_004270425.1               | 226 | 8 | 46224/<br>5.45          | -2.8 |    |    |
| F      | LT07 | A0A4U0E0K0    | CTP sintetase<br>FCF11_05720<br>WP_004270634.1                | 314 | 7 | 58991/<br>5.44          | -2.7 |   |   |
| E      | LT11 | UPI000230F388 | Type I glutamate--ammonia<br>ligase<br>GlnA<br>WP_004265314.1 | 382 | 9 | 50544/<br>5.40          | -2.3 |  |  |
| E<br>H | LT19 | UPI0006F0BB97 | Pyruvate oxidase<br>Pox<br>KRK92661.1                         | 240 | 9 | 61527/<br>5.06          | +1.6 |  |  |

|                        |        |      |                |                                                                                                                                 |     |   |                |      |                                                                                       |                                                                                       |
|------------------------|--------|------|----------------|---------------------------------------------------------------------------------------------------------------------------------|-----|---|----------------|------|---------------------------------------------------------------------------------------|---------------------------------------------------------------------------------------|
| CELL WALL BIOSYNTHESIS | F<br>R | LT28 | A0A1B2A4E0     | IMP dehydrogenase<br>GuaB<br>WP_004265151.1                                                                                     | 355 | 9 | 52368/<br>5.37 | -1.5 | 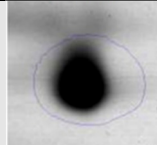   |    |
|                        | E      | LT35 | UPI000230EFAA  | ABC transporter family protein<br>OppF<br>WP_004265559.1                                                                        | 363 | 9 | 36057/<br>6.09 | -1.8 |    |    |
|                        | F      | LT37 | A0A1X7QJJ2     | UMP kinase<br>PyrH<br>WP_076800600.1                                                                                            | 245 | 5 | 25824/<br>5.04 | -1.5 |    |    |
|                        | M      | LT14 | WP_056967123.1 | bifunctional UDP-N-<br>acetylglucosamine<br>diphosphorylase/glucosamine-1-<br>phosphate N-acetyltransferase,<br>partial<br>GlmU | 240 | 7 | 43975/<br>5.73 | -1.4 |    |    |
|                        | M      | LT22 | UPI000B5EB748  | D-alanine--D-alanine ligase<br>Ddl<br>ASN59162.1<br>WP_004271284.1                                                              | 281 | 6 | 38239/<br>4.48 | -1.5 |    |    |
|                        | M      | LT23 | UPI000230D57D  | UTP--glucose-1-phosphate<br>uridylyltransferase<br>GalU<br>WP_004271214.1                                                       | 188 | 7 | 33693/<br>5.52 | -1.7 |   |   |
|                        | M      | LT39 | UPI000975D304  | dTDP-4-dehydrorhamnose 3,5-<br>epimerase<br>RfbC<br>WP_076638998.1                                                              | 431 | 9 | 21646/<br>5.35 | -1.4 |  |  |

|                               |        |      |               |                                                                                               |     |   |                         |      |                                                                                       |                                                                                       |
|-------------------------------|--------|------|---------------|-----------------------------------------------------------------------------------------------|-----|---|-------------------------|------|---------------------------------------------------------------------------------------|---------------------------------------------------------------------------------------|
| RNA RELATED                   | R      | LT13 | A0A221RYJ7    | GTPase Era<br>Era<br>WP_004270810.1                                                           | 165 | 5 | 34532/<br>6.04          | -1.7 | 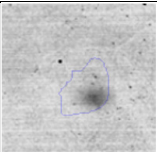   |    |
|                               | R      | LT18 | A0A1B2A7I2    | Ribonuclease J<br>Rnj<br>WP_065825720.1                                                       | 239 | 8 | 63559/<br>5.70          | -1.6 |    |    |
|                               | R      | LT38 | UPI000230F4ED | Phenylalanine-tRNA ligase/<br>DUF4479 domain-containing<br>protein<br>PheRS<br>WP_004270340.1 | 145 | 1 | 22224/<br>4.34          | -1.3 |    |    |
| DNA REPLICATION AND<br>REPAIR | L      | LT05 | A0A0B2XPH3    | Single-stranded DNA-binding<br>protein<br>Ssb<br>WP_004265848.1                               | 367 | 6 | 18621/<br>4.92          | -1.4 |    |    |
|                               | L      | LT20 | UPI000230F194 | putative endonuclease 4<br>Nfo<br>EHE85189.1                                                  | 107 | 6 | 32046/<br>5.28          | -1.5 |    |    |
| REDOX PROCESSES               | O      | LT06 | A0A1B2A4R3    | NAD(P)/FAD-<br>dependentOxidoreductase<br>BCY75_02680<br>WP_004270517.1                       | 173 | 3 | 36259<br>36281/<br>5.21 | -1.4 |   |   |
|                               | O<br>C | LT15 | A0A0B2XKA6    | Thioredoxin<br>TrxA<br>WP_004265032.1                                                         | 140 | 9 | 11555/<br>4.57          | -1.6 |  |  |

|                 |        |      |            |                                                                    |     |   |                |      |                                                                                     |                                                                                     |
|-----------------|--------|------|------------|--------------------------------------------------------------------|-----|---|----------------|------|-------------------------------------------------------------------------------------|-------------------------------------------------------------------------------------|
| REDOX PROCESSES | O      | LT21 | A0A385AFF0 | Thioredoxin-disulfide reductase<br>TrxB<br>WP_004265965.1          | 118 | 3 | 32787/<br>4.73 | -1.3 | 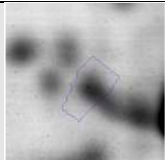 |  |
|                 | C<br>R | LT29 | A0A0B2XMI6 | NADP-dependent<br>oxidoreductase<br>OA78_1420<br>WP_035185948.1    | 421 | 9 | 33766/<br>5.13 | -1.3 |  |  |
| REGULATION      | K      | LT03 | A0A0B2XPU8 | Cold Shock protein<br>CspC<br>WP_004270163.1                       | 178 | 3 | 7346/<br>4.48  | -1.4 |  |  |
|                 | K      | LT17 | A0A0B2XP73 | MarR family transcriptional<br>regulator<br>OhrR<br>WP_039098448.1 | 173 | 6 | 17636/<br>5.97 | -2.0 |  |  |

<sup>a</sup>: Functional category according to COG database where each letter represents the different COG functional categories: O: molecular chaperones and related functions; J: translation, including ribosome structure and biogenesis; G: carbohydrate metabolism and transport; C: energy production and conversion; T: signal transduction mechanisms; K: transcription; E: amino acid transport and metabolism; F: nucleotide transport and metabolism; H: Coenzyme transport and metabolism; M: cell wall structure and biogenesis and outer membrane; L: Replication, recombination and repair; K: Transcription; R: general functional prediction only.

<sup>b</sup>: Spot designations correspond to those of the gels shown in Figure 3
